# Supplementary material for: Hygroscopic growth of atmospheric aerosol particles based on active remote sensing and radiosounding measurements: selected cases in southeastern Spain
Source: Copernicus journal article supplement (doi:10.5194/amt-8-705-2015), 2015-02-10
Supplement: Supplementary file 1 [file amt-8-705-2015-supplement.pdf]

Supplement of Atmos. Meas. Tech., 8, 705–718, 2015  
<http://www.atmos-meas-tech.net/8/705/2015/>  
doi:10.5194/amt-8-705-2015-supplement  
© Author(s) 2015. CC Attribution 3.0 License.

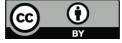

*Supplement of*

## **Hygroscopic growth of atmospheric aerosol particles based on active remote sensing and radiosounding measurements: selected cases in southeastern Spain**

**M. J. Granados-Muñoz et al.**

*Correspondence to:* M. J. Granados Muñoz (mjgranados@ugr.es)

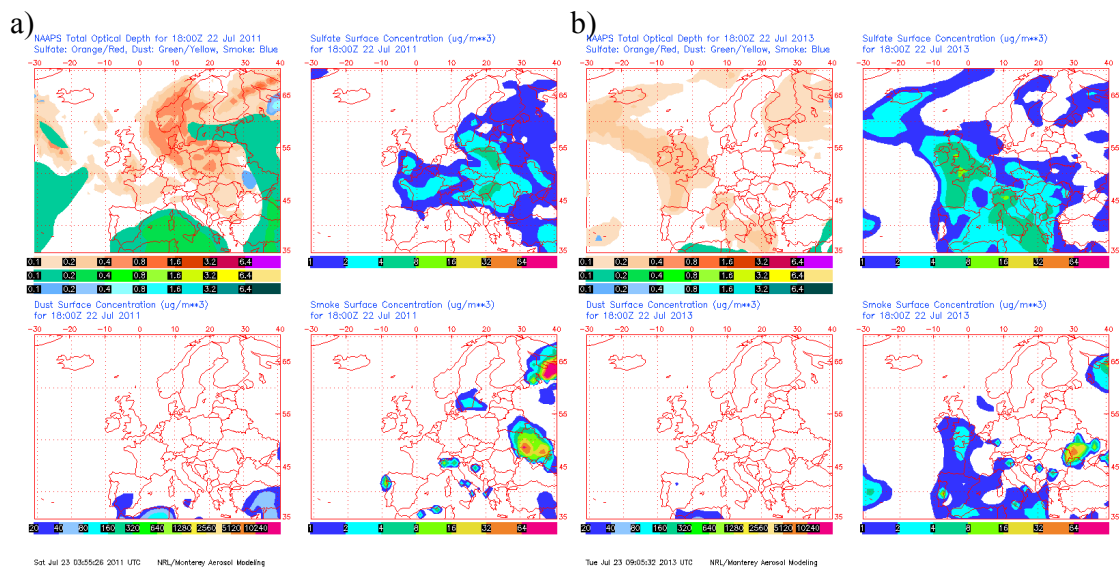

Figure S1. a) NAAPS model forecasts for 22<sup>nd</sup> July 2011 at 18:00 UTC. b) NAAPS model output on 22<sup>nd</sup> July 2013 at 18:00 UTC, which is the closest time to the radiosounding launch at 20:00 UTC.
